# Supplementary material for: Genome-wide association analysis of eosinophilic esophagitis provides insight into the tissue specificity of this allergic disease
Source: Springer Nature journal article supplement (doi:10.1038/ng.3033), 2014-07-13
Supplement: 41588_2014_BFng3033_MOESM61_ESM.pdf [file 41588_2014_BFng3033_MOESM61_ESM.pdf]

# Genome-wide association analysis of eosinophilic esophagitis provides insight into the tissue specificity of this allergic disease

## Supplementary Information

### Methods

- Genotyping
- Subjects
- Population Stratification
- Genotyping Quality Control
- Association and Linkage Disequilibrium Analysis
- Imputation to the 1,000 Genomes Reference Panel
- Expression Analysis
- Expression Microarray Analysis
- RNA sequencing
- Electrophoretic Mobility Shift Assay (EMSA)
- Organotropic Culture System
- H3K27Ac Analysis
- Calpain Activity Assay

**Supplementary Table 1.** Subjects in the EoE GWAS

**Supplementary Table 2.** Variants that demonstrated or failed to demonstrate association in CCHMC, CoFAR, or local analyses

**Supplementary Table 3.** Association of the top replicated loci in a logistic regression adjusted for atopy using all cases ( $n = 736$ ) and local controls ( $n = 760$ )

**Supplementary Table 4.** Meta-analysis of the association of SNPs at 5q22

**Supplementary Table 5.** Expression quantitative trait loci (eQTL) analysis of top EoE risk variants in a public database with expression from Peripheral blood mononuclear cells (PBMCs)

**Supplementary Table 6.** EoE genetic linkage with allergic sensitization markers

**Supplementary Figure 1.** Manhattan plot of the  $P$  values obtained from the genome-wide association analysis

**Supplementary Figure 2.** Expression of *XKR6*

**Supplementary Figure 3.** Fine mapping of loci associated (replicated and  $5 \times 10^{-8} < p < 10^{-6}$ ) with EoE risk

**Supplementary Figure 4.** Residual association at 5q22 after adjusting for rs1438672

**Supplementary Figure 5.** Expression of *CAPN14*

**Supplementary Figure 6.** Expression of genes near EoE-associated genetic variants ( $p < 10^{-4}$ ) in the esophageal biopsies of EoE patients versus controls

**Supplementary Figure 7.** Two genes, including *CAPN14*, are replicated in EoE genetic, expression, and epigenetic analyses

**Supplementary Figure 8.** Proposed model of increased EoE risk at *CAPN14* locus

**Supplementary Figure 9.** Association of variants identified in loci previously reported to be associated with allergic sensitization with EoE risk

**Supplementary Figure 10.** Flow chart of the EoE GWAS analytical pipeline

**Supplementary Figure 11.** The Genome-Studio cluster plot for rs8041227 (also known as kgp344467) at 15q13 from the OMNI5 analysis (all EoE cases and local controls)

**Supplementary Table 1. Subjects in the EoE GWAS**

|                          | Local EoE cohort |         | External CoFAR EoE |         | Local controls |         | External University of Michigan controls |         |
|--------------------------|------------------|---------|--------------------|---------|----------------|---------|------------------------------------------|---------|
|                          | Males            | Females | Males              | Females | Males          | Females | Males                                    | Females |
| <b>CCHMC cohort</b>      | 376              | 138     |                    |         | 376            | 384     | 2,459                                    | 3,539   |
| <b>CoFAR cohort</b>      |                  |         | 150                | 72      |                |         | 1,020                                    | 1,468   |
| <b>Combined analysis</b> | 514              |         | 222                |         | 760            |         | 8,486                                    |         |

EoE, Eosinophilic Esophagitis; CoFAR, NIH Consortium of Food Allergy Research [CoFAR].

**Supplementary Table 2. Variants that demonstrated or failed to demonstrate association in CCHMC cohort, CoFAR cohort, or local analyses.** We required that variants demonstrate association ( $p < 0.05$ ) in the CCHMC and CoFAR cohorts (Supplementary Table 1) and a local cohort analysis including all of the EoE cases in the CCHMC cohort and the locally recruited controls.

**Variants that demonstrated association in all three analyses:**

| Chr | SNP         | BP        | MAF cases | MAF controls | All cases and controls (weighted Z-score combined P) |       | Cases from CCHMC and controls from CCHMC and University of Michigan (dbGAP) |                 | Cases and controls from CCHMC |          | Cases from CoFAR and separate controls from University of Michigan (dbGAP) |                 |
|-----|-------------|-----------|-----------|--------------|------------------------------------------------------|-------|-----------------------------------------------------------------------------|-----------------|-------------------------------|----------|----------------------------------------------------------------------------|-----------------|
|     |             |           |           |              | p value                                              | OR    | p value CCHMC cohort                                                        | OR CCHMC cohort | p value local                 | OR local | p value CoFAR cohort                                                       | OR CoFAR cohort |
| 1   | rs2000260   | 108673405 | 0.37      | 0.43         | $6.56 \times 10^{-7}$                                | 0.757 | 0.0001099                                                                   | 0.773           | 0.00128                       | 0.766    | 0.00171                                                                    | 0.724           |
| 2   | rs77569859  | 31411287  | 0.09      | 0.05         | $3.30 \times 10^{-10}$                               | 1.982 | $1.41 \times 10^{-7}$                                                       | 1.930           | 0.00046                       | 1.787    | 0.00124                                                                    | 2.055           |
| 5   | rs3806933   | 110406742 | 0.37      | 0.44         | $2.00 \times 10^{-8}$                                | 0.731 | $1.32 \times 10^{-6}$                                                       | 0.724           | 0.00088                       | 0.759    | 0.00310                                                                    | 0.740           |
| 5   | rs2055376   | 116181428 | 0.04      | 0.02         | $7.12 \times 10^{-8}$                                | 2.296 | $1.89 \times 10^{-6}$                                                       | 2.289           | $6.24 \times 10^{-6}$         | 3.323    | 0.00772                                                                    | 2.400           |
| 8   | rs2898261   | 10958539  | 0.35      | 0.42         | $4.84 \times 10^{-8}$                                | 0.735 | $1.73 \times 10^{-6}$                                                       | 0.724           | $1.34 \times 10^{-5}$         | 0.696    | 0.00616                                                                    | 0.755           |
| 10  | rs11819199  | 20865157  | 0.09      | 0.06         | $2.89 \times 10^{-7}$                                | 1.62  | $1.64 \times 10^{-5}$                                                       | 1.618           | 0.00032                       | 1.735    | 0.00204                                                                    | 1.700           |
| 11  | rs2155219   | 76299194  | 0.413     | 0.491        | $3.65 \times 10^{-7}$                                | 0.729 | $2.64 \times 10^{-5}$                                                       | 0.743           | 0.00050                       | 0.742    | 0.00583                                                                    | 0.670           |
| 11  | rs118086209 | 86104495  | 0.03      | 0.02         | $2.35 \times 10^{-7}$                                | 2.19  | 0.000193                                                                    | 1.993           | 0.00106                       | 2.479    | $6.61 \times 10^{-5}$                                                      | 2.831           |
| 15  | rs8041227   | 31538542  | 0.2       | 0.28         | $6.34 \times 10^{-10}$                               | 0.657 | $3.97 \times 10^{-6}$                                                       | 0.6932          | 0.00277                       | 0.749    | $3.38 \times 10^{-5}$                                                      | 0.581           |
| 21  | rs17004598  | 45078556  | 0.03      | 0.01         | $1.37 \times 10^{-7}$                                | 2.566 | $4.48 \times 10^{-6}$                                                       | 2.592           | 0.00204                       | 2.640    | 0.00329                                                                    | 2.754           |

BP, build 37 map position of the SNP; CCHMC, Cincinnati Children's Hospital Medical Center; CoFAR, NIH Consortium of Food Allergy Research); Chr and band, chromosome and cytogenetic band; MAF, minor allele frequency across cases or controls; OR, odds ratio for the minor allele; p value, the weighted Z-score method implemented in METAL was used to combine the p values for the CCHMC and CoFAR cohorts; SNP, rs ID of variant.

## Supplementary Table 2 (continued)

### Variants that failed to demonstrate association in one of the three analyses:

| Chr | SNP        | BP       | MAF cases | MAF controls | All cases and controls (weighted Z-score combined P) |       | Cases from CCHMC and controls from CCHMC and University of Michigan (dbGAP) |                 | Cases and controls from CCHMC |              | Cases from CoFAR and separate controls from University of Michigan (dbGAP) |                 |
|-----|------------|----------|-----------|--------------|------------------------------------------------------|-------|-----------------------------------------------------------------------------|-----------------|-------------------------------|--------------|----------------------------------------------------------------------------|-----------------|
|     |            |          |           |              | p value                                              | OR    | p value CCHMC cohort                                                        | OR CCHMC cohort | p value local                 | OR local     | p value CoFAR cohort                                                       | OR CoFAR cohort |
| 1   | rs28530674 | 19234134 | 0.07      | 0.04         | 3.43x10 <sup>-7</sup>                                | 1.826 | 1.24x10 <sup>-8</sup>                                                       | 2.074           | 6.58x10 <sup>-5</sup>         | 2.015        | <b>0.73</b>                                                                | <b>1.112</b>    |
| 1   | rs2296225  | 21031042 | 0.13      | 0.08         | 1.08x10 <sup>-7</sup>                                | 1.626 | 1.03x10 <sup>-7</sup>                                                       | 1.713           | 0.0018                        | 1.505        | <b>0.32</b>                                                                | <b>1.24</b>     |
| 11  | rs77301713 | 76832446 | 0.04      | 0.02         | 1.46x10 <sup>-7</sup>                                | 2.22  | 4.06x10 <sup>-10</sup>                                                      | 2.669           | 1.72x10 <sup>-5</sup>         | 2.766        | <b>0.38</b>                                                                | <b>0.602</b>    |
| 17  | rs3744790  | 76893135 | 0.14      | 0.2          | 8.16x10 <sup>-7</sup>                                | 0.651 | 2.50x10 <sup>-6</sup>                                                       | 0.623           | 2.58x10 <sup>-5</sup>         | 0.609        | <b>0.097</b>                                                               | <b>0.748</b>    |
| 22  | rs2075277  | 21382482 | 0.13      | 0.09         | 9.36x10 <sup>-7</sup>                                | 1.544 | 2.28x10 <sup>-6</sup>                                                       | 1.599           | 0.0011                        | 1.526        | <b>0.089</b>                                                               | <b>1.39</b>     |
| 1   | rs11206830 | 56960123 | 0.04      | 0.02         | 7.92x10 <sup>-8</sup>                                | 2.162 | 0.0017                                                                      | 1.775           | <b>0.18</b>                   | <b>1.377</b> | 1.49x10 <sup>-7</sup>                                                      | 3.36            |
| 18  | rs9956738  | 49940973 | 0.03      | 0.01         | 3.53x10 <sup>-7</sup>                                | 2.472 | 0.0038                                                                      | 1.913           | <b>0.11</b>                   | <b>1.613</b> | 2.59x10 <sup>-7</sup>                                                      | 4.321           |

BP, build 37 map position of the SNP; CCHMC, Cincinnati Children's Hospital Medical Center; CoFAR, NIH Consortium of Food Allergy Research); Chr and band, chromosome and cytogenetic band; MAF, minor allele frequency across cases or controls; OR, odds ratio for the minor allele; p value, the weighted Z-score method implemented in METAL was used to combine the p values for the CCHMC and CoFAR cohorts; SNP, rs ID of variant.

**Supplementary Table 3. Association of the top replicated loci in a logistic regression adjusted for atopy using all cases (n = 736) and local controls (n = 760).** Bolded loci reach genome-wide significance in the combined analysis. The difference between the odds ratio of the unadjusted association and the association with atopy adjustment is given in the column “Difference in OR”.

| Chr       | SNP               | BP               | Band  | Nearest Gene                                     | Association with atopy adjustment       |               |                  |
|-----------|-------------------|------------------|-------|--------------------------------------------------|-----------------------------------------|---------------|------------------|
|           |                   |                  |       |                                                  | p value                                 | Odds Ratio    | Difference in OR |
| 1         | rs2000260         | 108673405        | 1p13  | <i>SLC25A24</i>                                  | $7.27 \times 10^{-4}$                   | 0.7555        | 0.002            |
| <b>2</b>  | <b>rs77569859</b> | <b>31411287</b>  | 2p23  | <b><i>CAPN14</i></b>                             | <b><math>3.10 \times 10^{-4}</math></b> | <b>1.979</b>  | 0.003            |
| <b>5</b>  | <b>rs3806933</b>  | <b>110406742</b> | 5q22  | <b><i>TSLP/WDR36</i></b>                         | <b><math>4.98 \times 10^{-5}</math></b> | <b>0.7116</b> | 0.019            |
| 5         | rs2055376         | 116181428        | 5q23  | Near <i>SEMA6a</i>                               | $5.56 \times 10^{-3}$                   | 2.236         | 0.060            |
| <b>8</b>  | <b>rs2898261</b>  | <b>5001364</b>   | 8p23  | <b><i>XKR6</i></b>                               | <b><math>6.23 \times 10^{-2}</math></b> | <b>1.401</b>  | -0.666           |
| 10        | rs11819199        | 139337546        | 10p12 | <i>MIR4675</i>                                   | $3.39 \times 10^{-5}$                   | 2.536         | -0.916           |
| 11        | rs2155219         | 20865157         | 11q13 | Between <i>C11orf30</i> and <i>LRRC32</i>        | $2.95 \times 10^{-4}$                   | 1.768         | -1.039           |
| 11        | rs118086209       | 86104495         | 11q14 | <i>CCDC81</i>                                    | $1.36 \times 10^{-3}$                   | 2.553         | -0.363           |
| <b>15</b> | <b>rs8041227</b>  | <b>31538542</b>  | 15q13 | <b>Between <i>LOC283710</i> and <i>KLF13</i></b> | <b><math>3.96 \times 10^{-4}</math></b> | <b>0.7097</b> | -0.053           |
| 21        | rs17004598        | 45078556         | 21q22 | <i>HSF2BP</i>                                    | $7.25 \times 10^{-4}$                   | 3.059         | -0.493           |

**Supplementary Table 4. Meta-analysis of the association of SNPs at 5q22.** The results of the previous genome-wide association study of EoE<sup>9</sup> was combined with the association of the same variants in the current study using the Fisher's method to combined p values. Subjects included in both studies were removed from the present study before the p value was calculated.

| SNP        | Position    | EoE Genome-wide study p value |                      | Combined p value      |
|------------|-------------|-------------------------------|----------------------|-----------------------|
|            |             | 2009                          | 2014                 |                       |
| rs3806932  | 110,433,574 | 3.1x10 <sup>-9</sup>          | 7.2x10 <sup>-8</sup> | 2.3x10 <sup>-16</sup> |
| rs7723819  | 110,455,246 | 7.6x10 <sup>-9</sup>          | 2.5x10 <sup>-8</sup> | 1.9x10 <sup>-16</sup> |
| rs10051830 | 110,480,744 | 2.3x10 <sup>-8</sup>          | 2.9x10 <sup>-7</sup> | 6.6x10 <sup>-16</sup> |

Position, build 37 map position of the SNP; Chr, chromosome and cytogenetic band; SNP, rs ID of variant

**Supplementary Table 5. Expression quantitative trait loci (eQTL) analysis of top EoE risk variants in a public database with expression from peripheral blood mononuclear cells.**

| CHR | SNP       | SNP Position | Probe   | Z-score | Gene name       | p value               |
|-----|-----------|--------------|---------|---------|-----------------|-----------------------|
| 1   | rs2000260 | 108474928    | 7510681 | 6.07    | <i>SLC25A24</i> | 1.25x10 <sup>-9</sup> |
| 8   | rs2898261 | 10995949     | 4730672 | 5.32    | <i>XKR6</i>     | 1.02x10 <sup>-7</sup> |

Chr, chromosome and cytogenetic band; SNP, rs ID of variant; SNP Position, build 37 map position of the SNP.



**Supplementary Table 6. EoE genetic linkage with allergic sensitization markers<sup>†</sup>**

| Chr | Marker            | Position         | Gene                          | Odds Ratio AS | p value                     | Odds Ratio EoE |
|-----|-------------------|------------------|-------------------------------|---------------|-----------------------------|----------------|
| 1   | rs2056417         | 10581658         | <i>PEX14</i>                  | 1.07          | 0.26                        | 0.927          |
| 2*  | rs10174949        | 8442248          | <i>ID2</i>                    | 1.07          | 0.32                        | 0.95           |
| 2   | rs10189629        | 102879464        | <i>IL1RL2/IL1RL1</i>          | 1.16          | 0.84                        | 1.02           |
| 2*  | <b>rs10497813</b> | <b>198914072</b> | <b><i>PLCL1</i></b>           | <b>0.92</b>   | <b>0.031</b>                | <b>0.888</b>   |
| 3*  | <b>rs9860547</b>  | <b>188128979</b> | <b><i>LPP</i></b>             | <b>1.08</b>   | <b>5.0x10<sup>-7</sup></b>  | <b>1.32</b>    |
| 4*  | rs2101521         | 38811551         | <i>TLR1/TLR6</i>              | 1.12          | 0.43                        | 0.948          |
| 4   | rs17388568        | 123329362        | <i>ADAD1</i>                  | 1.08          | 0.11                        | 1.11           |
| 5   | rs7720838         | 40486896         | <i>PTGER4</i>                 | 1.08          | 0.91                        | 1.00           |
| 5*  | <b>rs1438673</b>  | <b>110467499</b> | <b><i>WDR36/CAMK4</i></b>     | <b>0.89</b>   | <b>5.1x10<sup>-11</sup></b> | <b>0.685</b>   |
| 6   | rs9266772         | 31352113         | <i>HLA-C/MICA</i>             | 1.11          | 0.28                        | 1.086          |
| 6   | rs6906021         | 32626311         | <i>HLA-DQA1/HLA-DQB1</i>      | 1.10          | 0.26                        | 1.08           |
| 8   | <b>rs6473223</b>  | <b>81268155</b>  | <b><i>TPD52/ZBTB10</i></b>    | <b>1.07</b>   | <b>0.00019</b>              | <b>1.26</b>    |
| 9   | <b>rs7032572</b>  | <b>6172380</b>   | <b><i>RANBP6/IL33</i></b>     | <b>1.12</b>   | <b>0.048</b>                | <b>1.17</b>    |
| 10* | <b>rs962993</b>   | <b>9053132</b>   | <b><i>GATA3</i></b>           | <b>0.93</b>   | <b>0.019</b>                | <b>0.877</b>   |
| 11  | <b>rs2155219</b>  | <b>76299194</b>  | <b><i>C11orf30/LRRC32</i></b> | <b>0.90</b>   | <b>1.1x10<sup>-6</sup></b>  | <b>0.759</b>   |
| 11  | rs10893845        | 128186882        | <i>ETS1</i>                   | 1.06          | 0.73                        | 0.979          |
| 14* | rs1998359         | 38077148         | <i>FOXA1/TTC6</i>             | 1.08          | 0.66                        | 1.03           |
| 15* | <b>rs17228058</b> | <b>67450305</b>  | <b><i>SMAD3</i></b>           | <b>1.08</b>   | <b>0.0032</b>               | <b>1.20</b>    |
| 16* | rs2107357         | 27410829         | <i>IL4R/IL21R</i>             | 1.09          | 0.53                        | 0.948          |
| 17* | rs9303280         | 38074031         | <i>GSDMB</i>                  | 1.07          | 0.51                        | 0.964          |
| 16  | <b>rs7203459</b>  | <b>11230703</b>  | <b><i>CLEC16A</i></b>         | <b>0.93</b>   | <b>4.6x10<sup>-5</sup></b>  | <b>0.731</b>   |
| 20  | rs6021270         | 50141264         | <i>NFATC2</i>                 | 1.16          | 0.57                        | 1.07           |

<sup>†</sup>Association of variant previously reported at genome-wide significant in two GWAS of allergic sensitization (AS)<sup>39,40</sup>. An asterisk by the chromosome indicates that the variant was imputed from the EoE GWAS. The odds ratios are given for the allele with the smallest frequency (the minor allele) in the EoE analysis.

a. CCHMC cohort: 514 cases and 6,758 controls

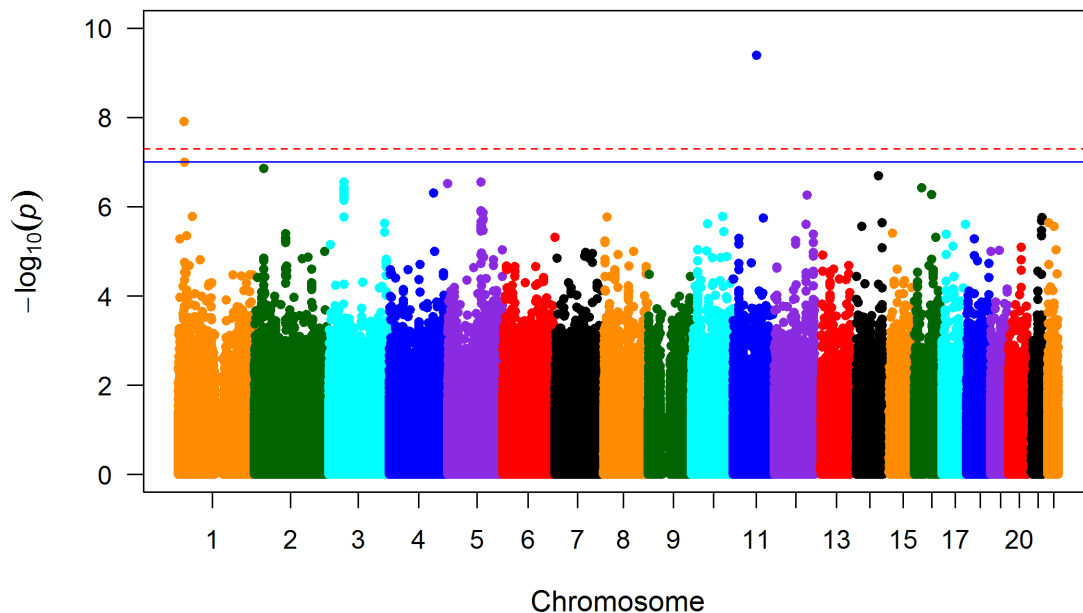

b. CoFAR cohort: 222 cases and 2,488 controls

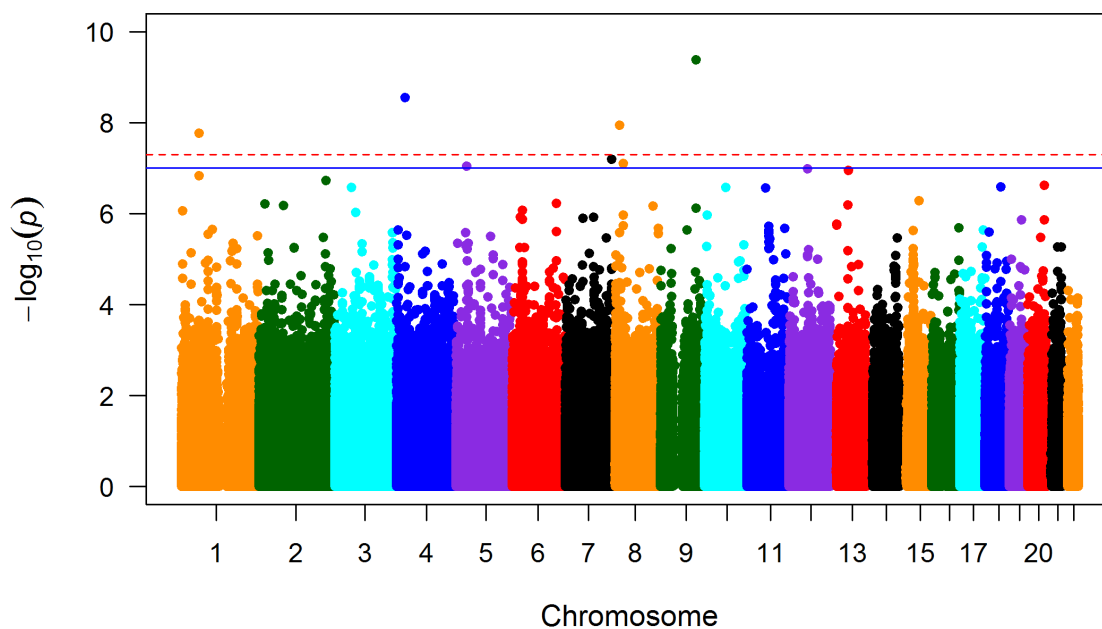

**Supplementary Figure 1. Manhattan plot of the p values obtained from the genome-wide association analysis.** Data is from 1,468,075 genetic variants with minor allele frequencies greater than 1% in the subjects with EoE in 514 EoE cases and 6,758 controls (a) and 222 cases and 2,488 controls (b). The  $-\log$  of the probability is shown as a function of the genomic position on the autosomes. Genome-wide significance (red dotted line,  $p \leq 5 \times 10^{-8}$ ) and suggestive significance (blue line,  $p \leq 10^{-7}$ ) are indicated.

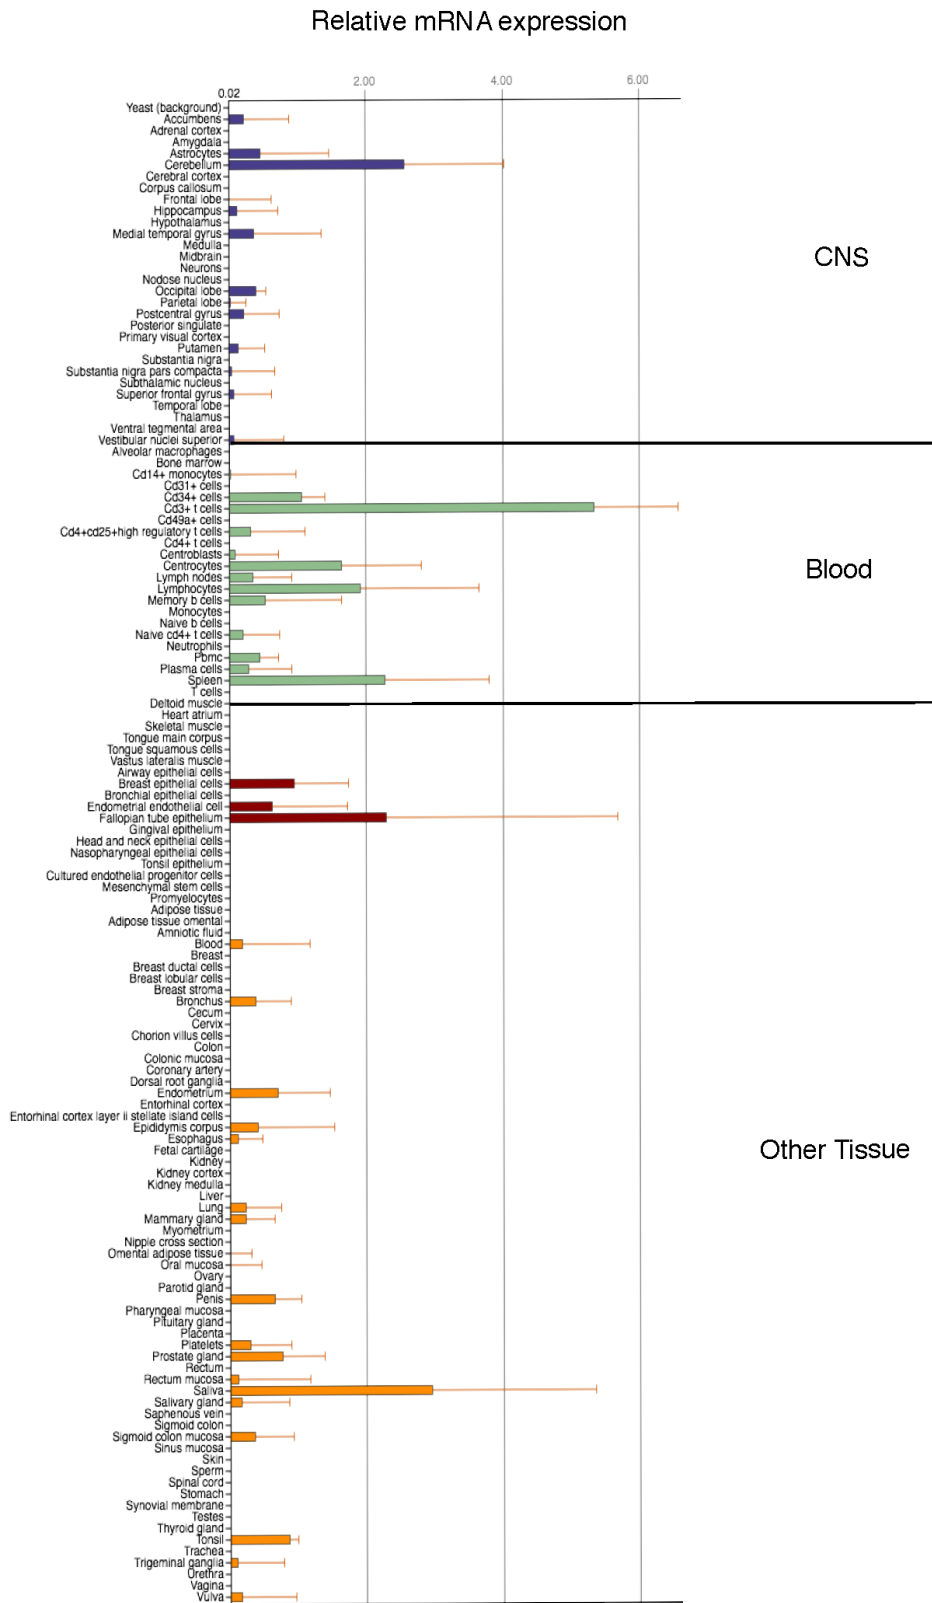

**Supplementary Figure 2. The expression of *XKR6*** (data collected from [www.biogps.org](http://www.biogps.org))<sup>52,53</sup>. The colors of the bars correspond to the tissue source.

# Supplementary Figure 3

## 1q13

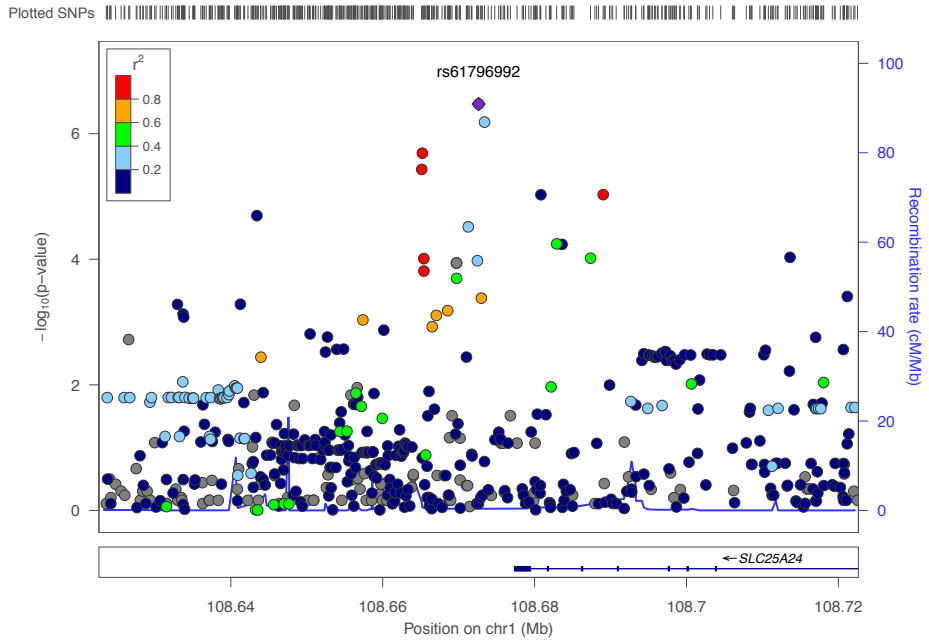

## 5q23

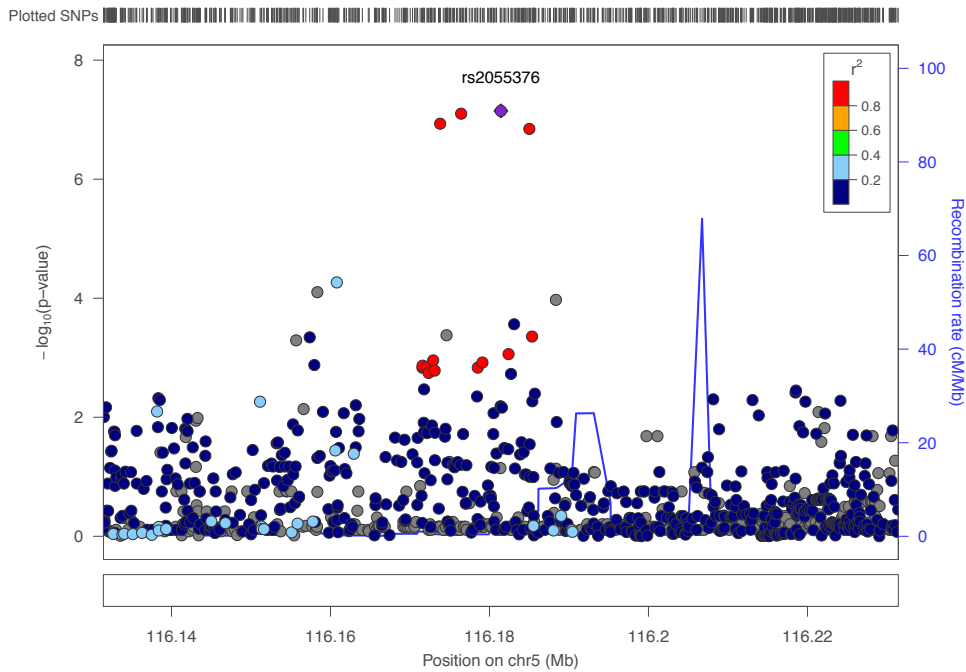

## Supplementary Figure 3 (continued)

### 10p12

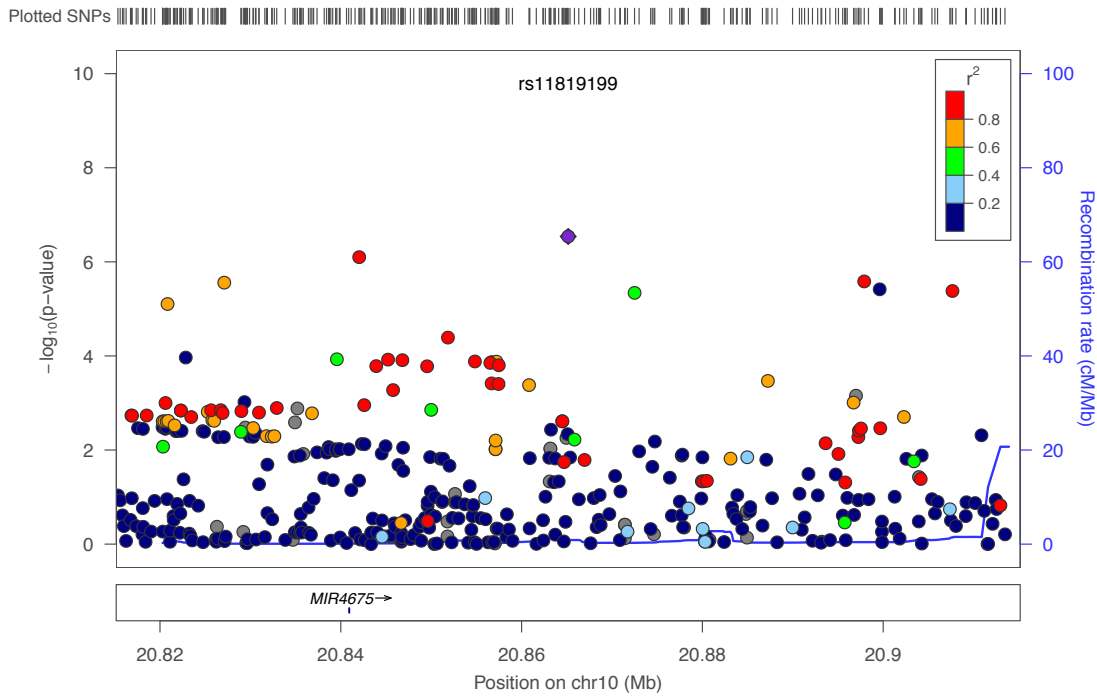

### 11q13

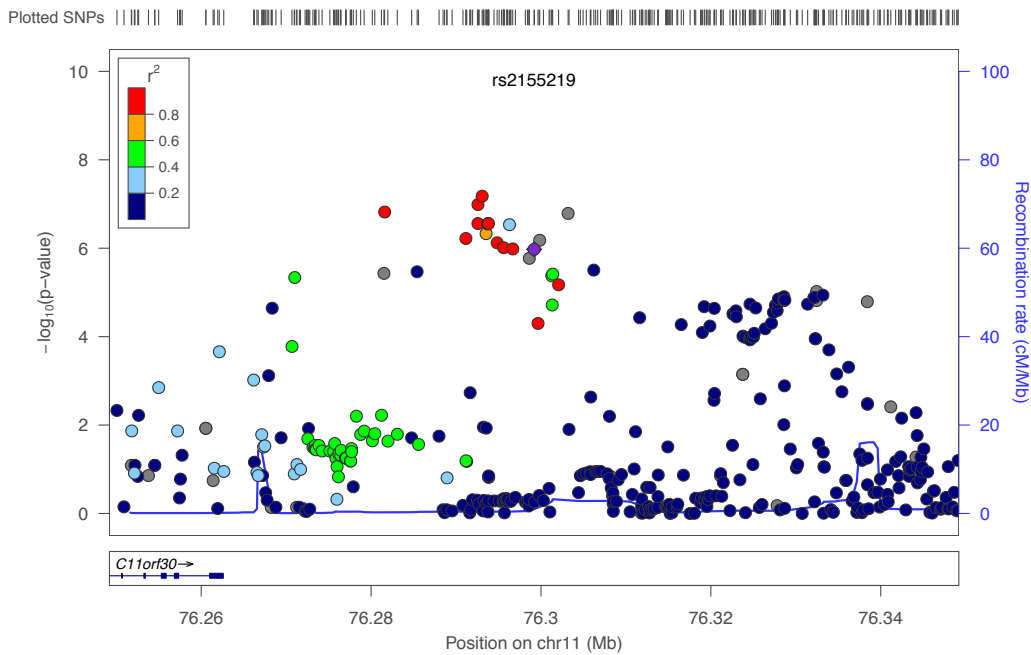

## Supplementary Figure 3 (continued)

11q14

11q14.2

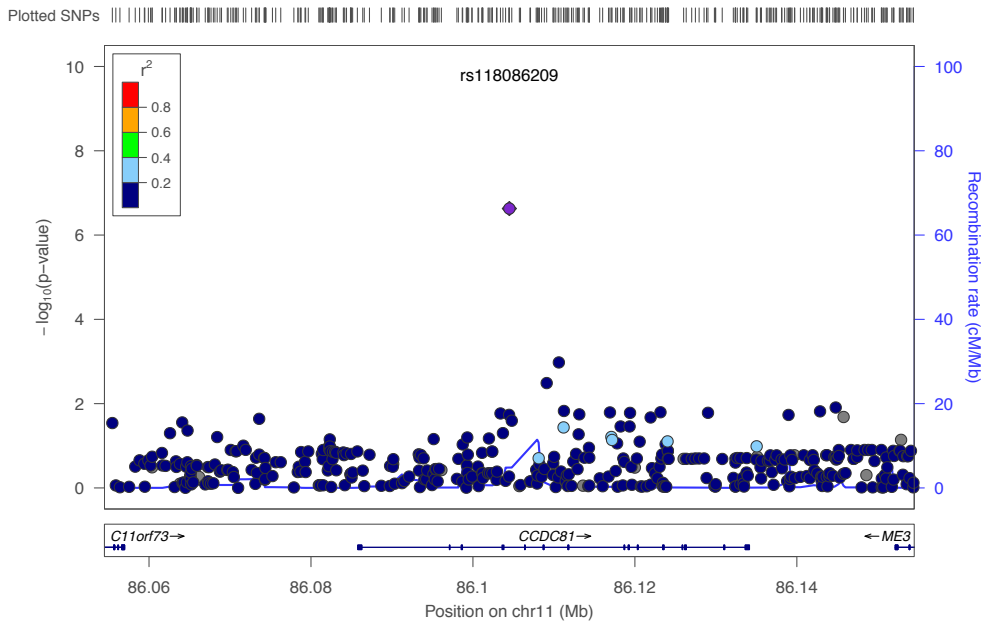

21q22

21q22.3

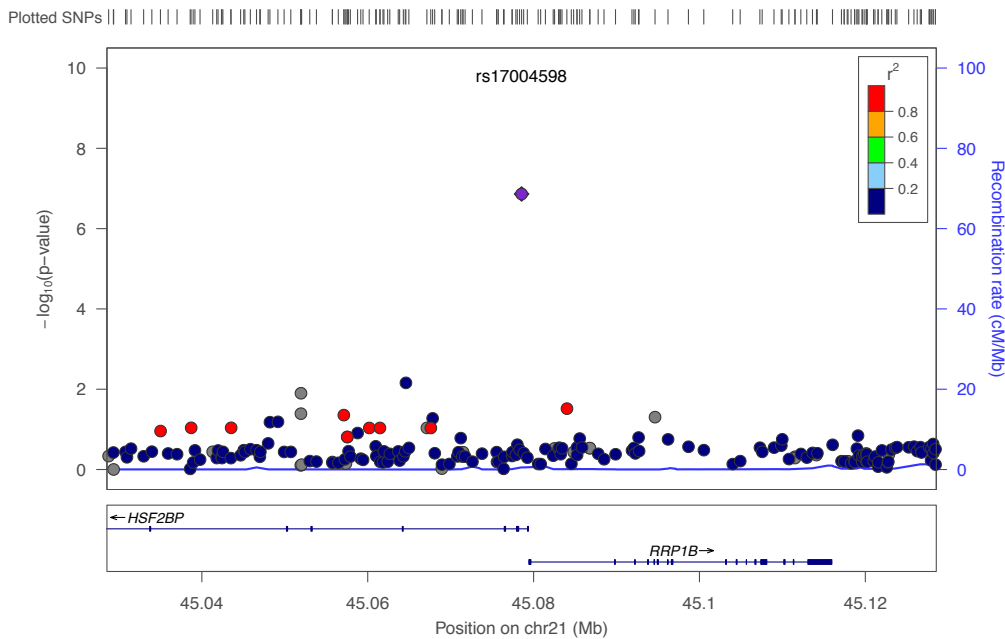

**Supplementary Figure 3. Fine mapping of loci associated (replicated and  $5 \times 10^{-8} < p < 10^{-6}$ ) with EoE risk. P values ( $-\log_{10}$ ) of the genetic association analysis of imputed variants on the y axis are plotted as a function of genomic positions of each genotyped and imputed SNPs (MAF > 0.05). Genes in the region are shown below. The LD values ( $r^2$ ) between the lead SNP and the other SNPs as assessed in the March 2012 release of the 1,000 genomes project are indicated in different colors. The blue lines indicate the recombination rates in cM per Mb using HapMap controls.**

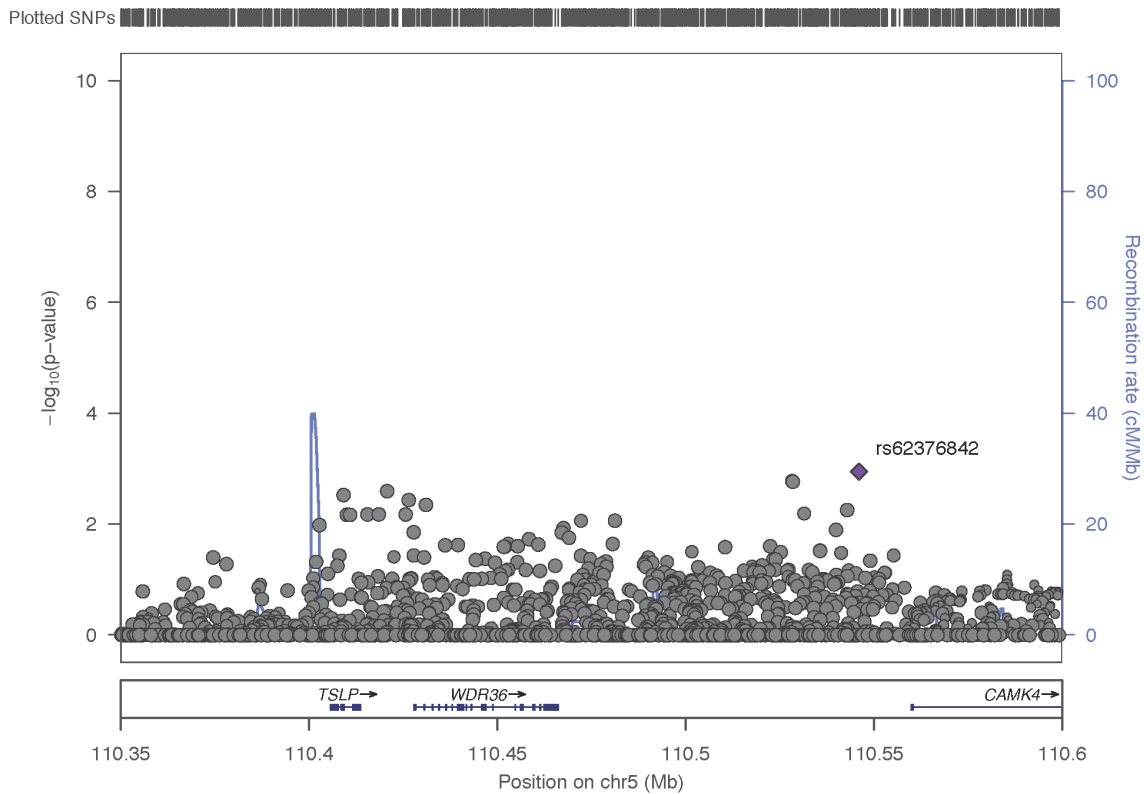

**Supplementary Figure 4. 5q22.** After adjusting for any of the most highly associated variants in the region (rs1438672), a group of 12 variants between *TSLP* and *WDR36* demonstrate residual association  $0.001 < p < 0.05$ . After accounting for multiple testing, we cannot reject the null hypothesis that there is one independent genetic effect in the region. *P* values ( $-\log_{10}$ ) of genetic association analysis are plotted as a function of genomic positions of each imputed variant (minor allele frequency (MAF) > 0.01) on chromosome 5 (Chr5) using a logistic regression adjusting the genotype of rs1438672. Genes in the region are shown below. The blue lines indicate the recombination rates in cM per Mb using HapMap controls.

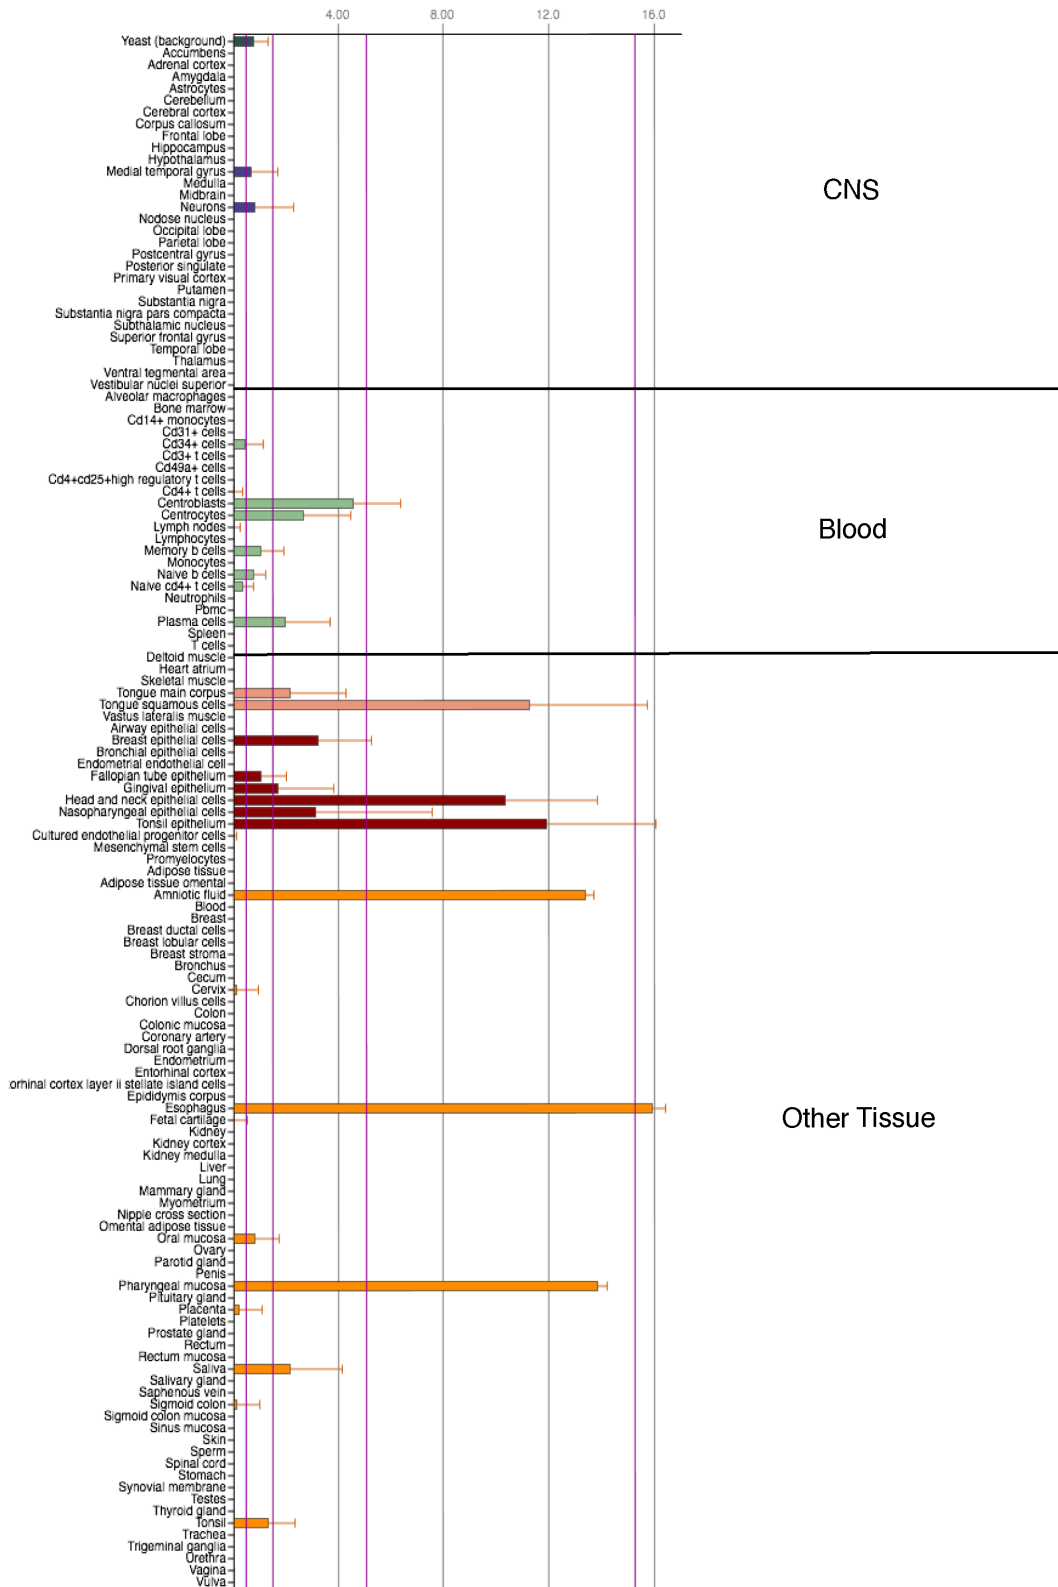

**Supplementary Figure 5. Expression of CAPN14** (data collected from [www.biogps.org](http://www.biogps.org))<sup>52,53</sup>. The colors of the bars correspond to the tissue source.



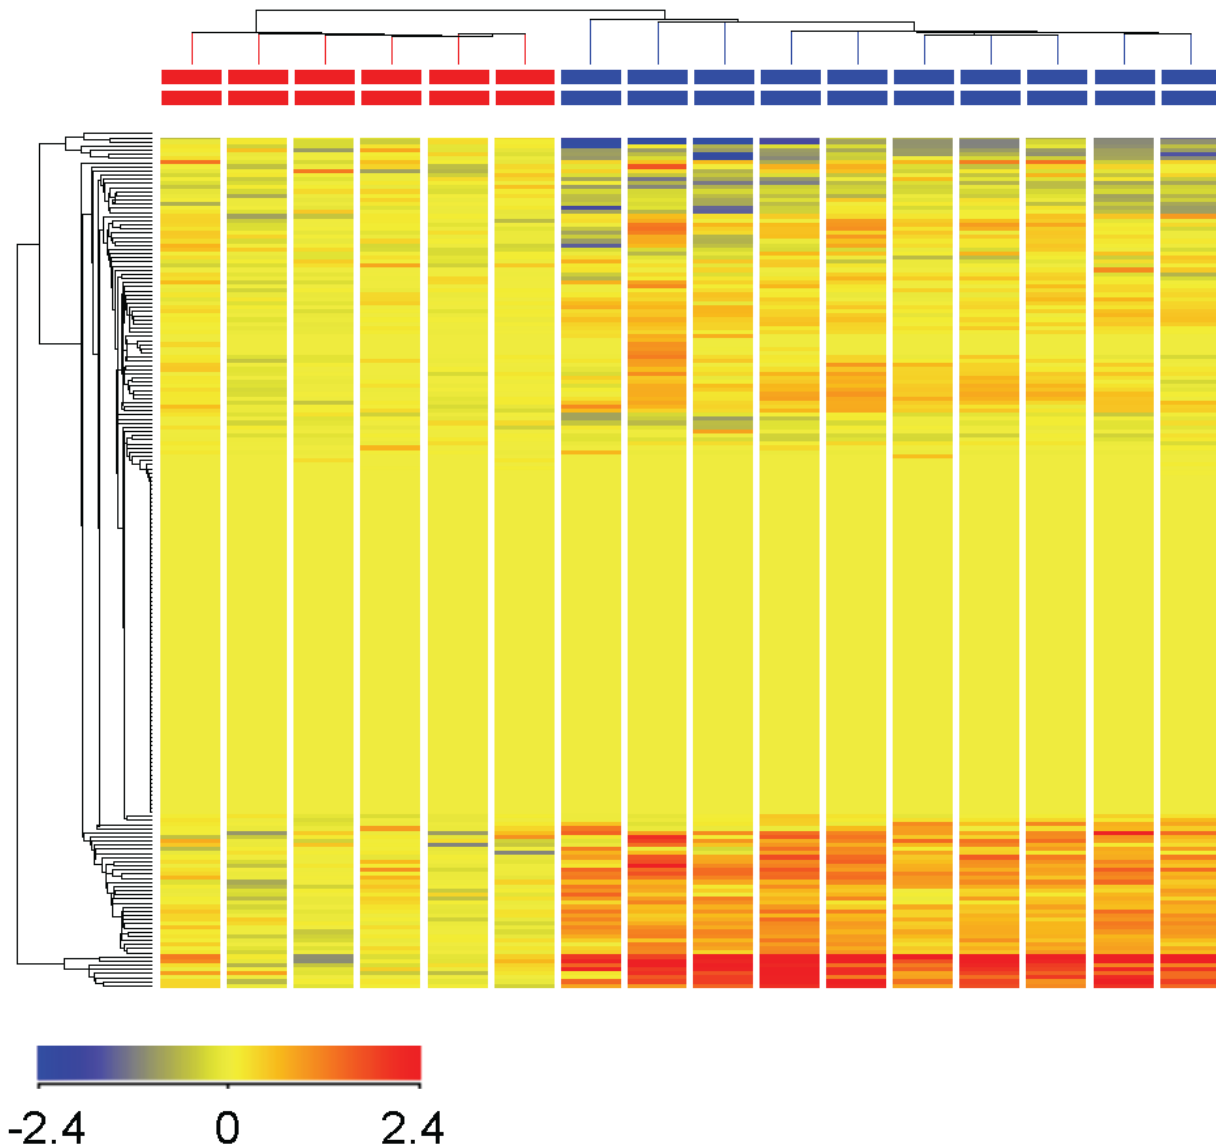

**Supplementary Figure 6. Expression of genes near EoE-associated genetic variants ( $p < 10^{-4}$ ) in the esophageal biopsies of EoE patients vs. controls.** In this dataset, 9 of the 215 transcripts (representing 208 genes) have an average difference of  $\geq 2$  FPKMs between esophagi from active EoE cases and controls. The differences in expression were sufficient to segregate EoE cases from controls. The 8 transcripts with differences in expression greater than 2-fold can be found in **Figure 4**. Subjects with EoE are noted with blue bars, and subjects without EoE are indicated with red bars. All expression is normalized to the average expression in esophageal biopsies without EoE.

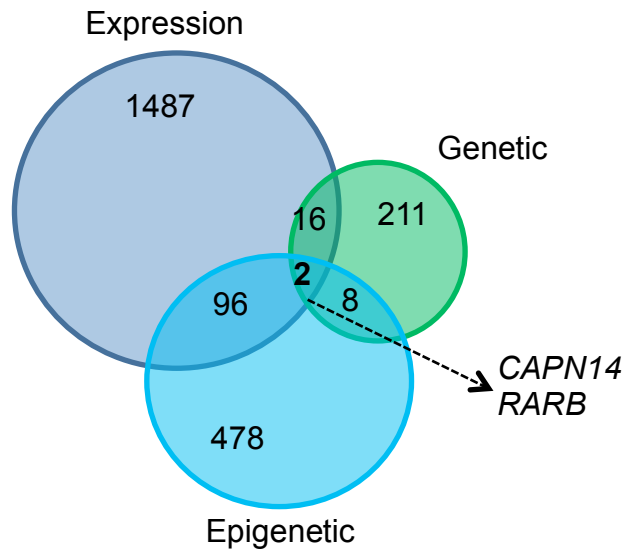

|                      | H3K27Ac     |         |                      |
|----------------------|-------------|---------|----------------------|
|                      | Fold change | M value | P value              |
| <b><i>CAPN14</i></b> | 6.02        | -3.08   | $5.8 \times 10^{-5}$ |
| <b><i>RARB</i></b>   | 5.19        | -1.5    | 0.0001               |

**Supplementary Figure 7. Two genes including *CAPN14* are replicated in EoE genetic, expression, and epigenetic analyses.** We assessed overlap from analyses of genes within 25 kb of genetic variants with  $p < 10^{-4}$ , genes with increased H3K27Ac after 6-hour exposure to IL-13 ( $p < 0.01$ ,  $M < -1$  at 5 kb from TSS), and genes with increased esophageal expression in EoE (2-fold increase in expression in esophageal biopsy in EoE compared to control, corrected  $p < 0.05$ ).

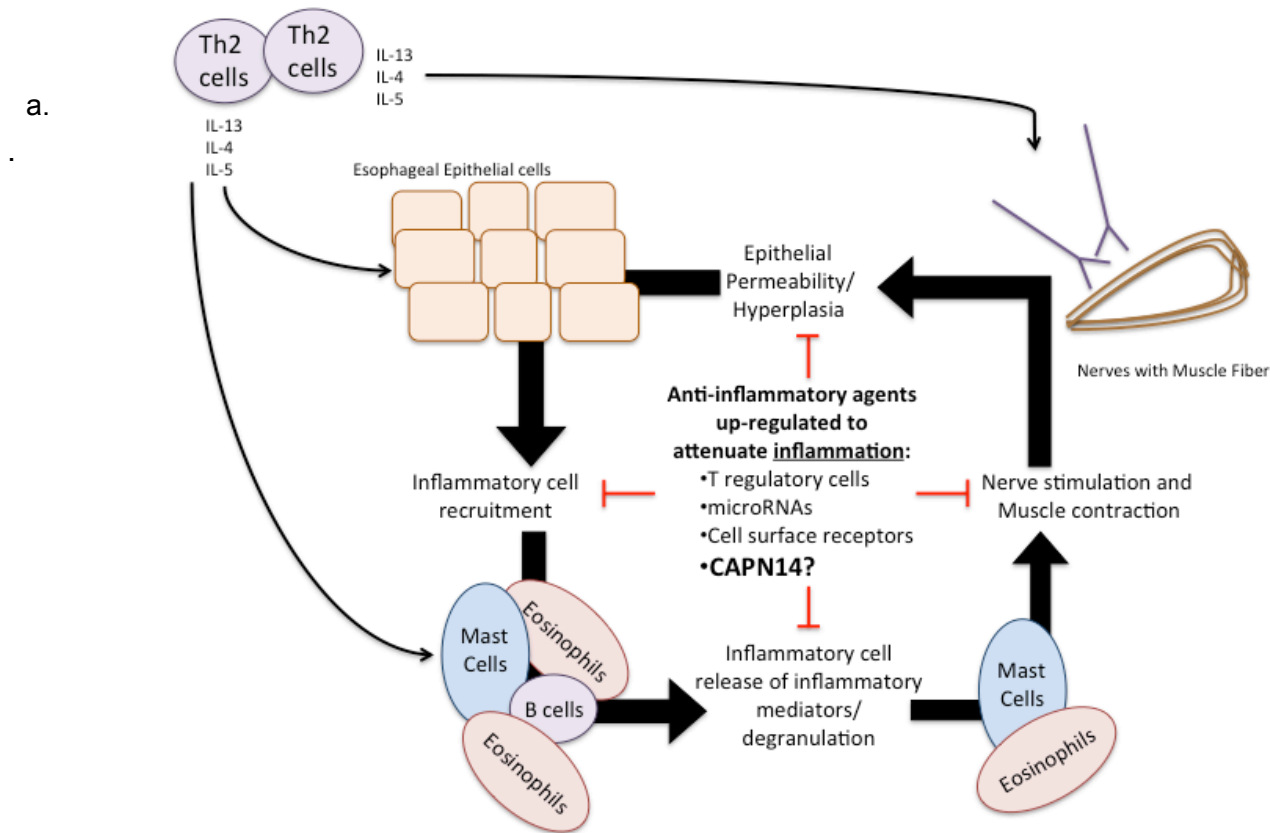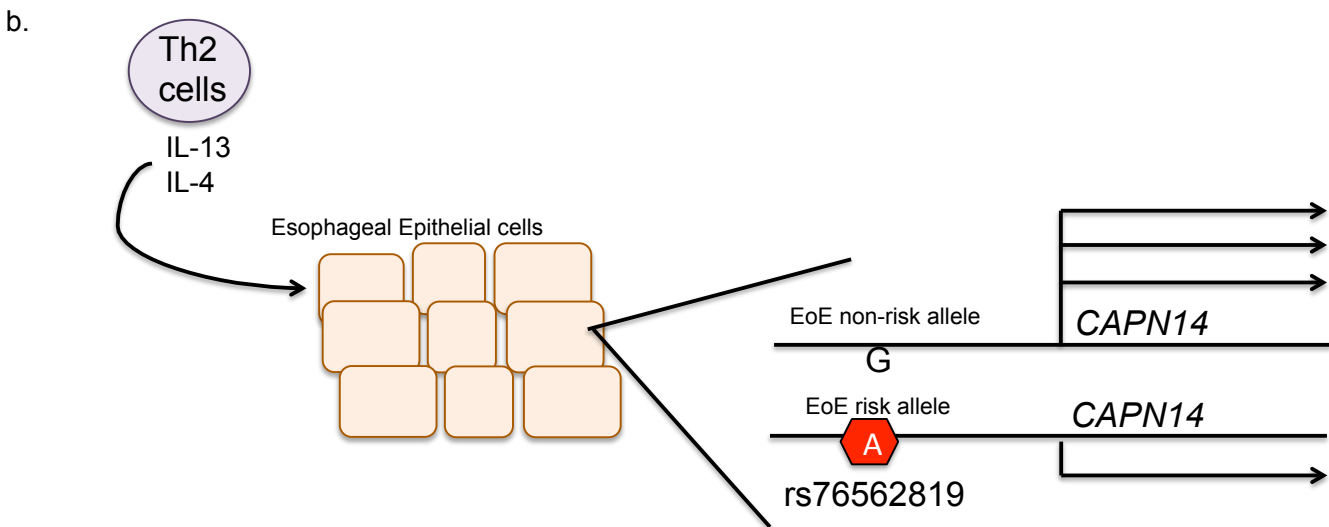

**Supplementary Figure 8. Proposed model of increased EoE risk at *CAPN14* locus.** *CAPN14* is expressed specifically in the esophagus (Fig. 1). Allergic inflammatory mediators including IL-13 and IL-4 induce *CAPN14* expression and activity (Fig. 2 and 3<sup>36,37</sup>), and the regulation of the increased expression is mediated in part through the acetylation of histones (Figure 2i). The abundance of IL-13 and IL-4 in the esophagus of patients with EoE<sup>5-8</sup> results in increased *CAPN14* expression (Fig. 2j) and activity (Fig. 2k), and the calpain activity of *CAPN14* potentially attenuates further inflammation by digesting endogenous proteins. The genetic variants

associated with EoE risk at the *CAPN14* locus lead to decreased *CAPN14* expression (Fig. 1) feasibly through the binding of a protein (Fig. 2), a transcription factor that potentially acts as a transcriptional repressor. Together, our data is consistent with a model in which *CAPN14* is induced along with other anti-inflammatory agents such as microRNAs, cell surface receptors, and T regulatory cells. When exposed to IL-13 and IL-4, chromosomes in epithelial cells with the *CAPN14* EoE risk allele are unable to induce *CAPN14* expression to the extent of chromosomes with the non-risk allele. We propose a model in which the allelic change in *CAPN14* expression dysregulates a critical negative feedback loop in the esophagus resulting in increased risk of pathology and EoE.

## CLEC16A

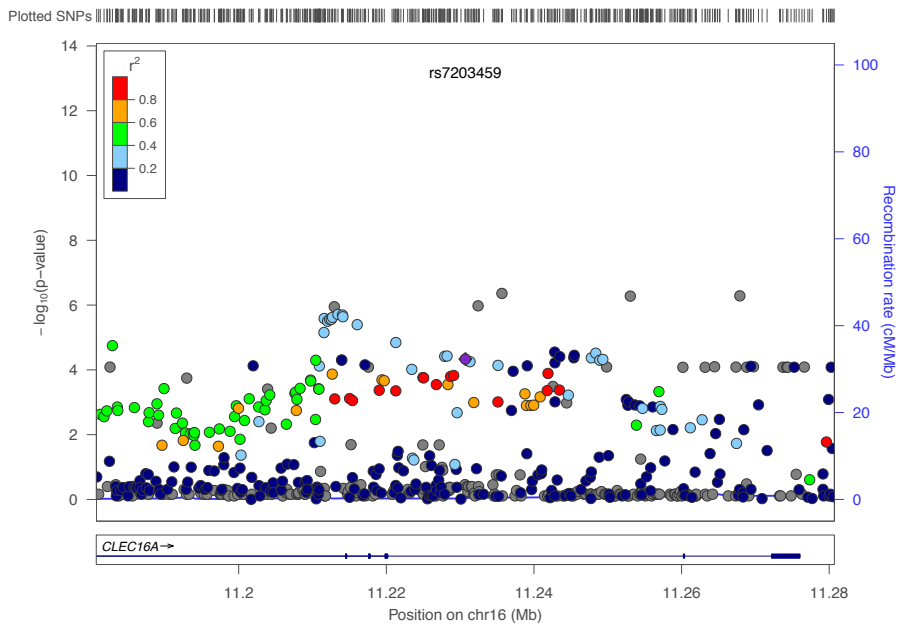

## C11orf30/LRRC32

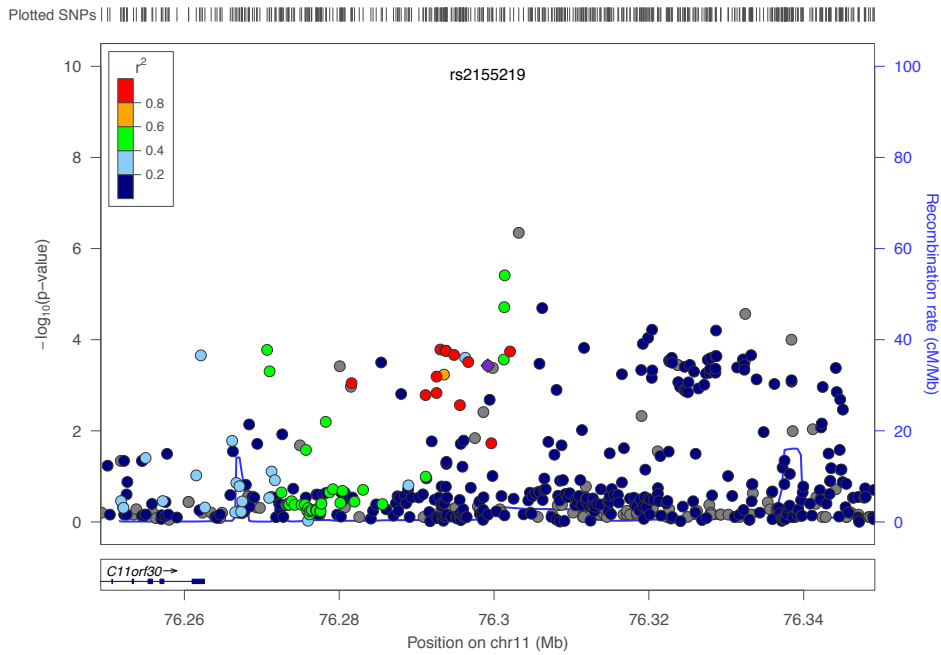

## Supplementary Figure 9 (continued)

### *LPP*

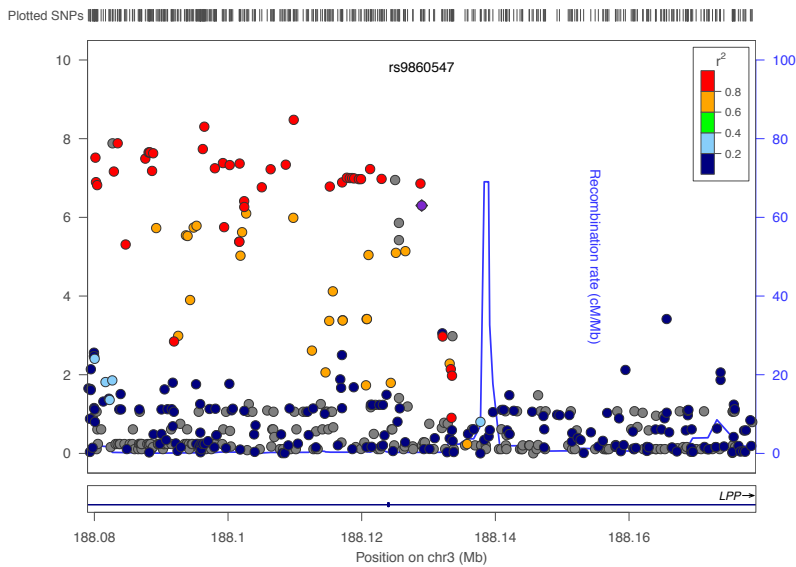

### *IL33*

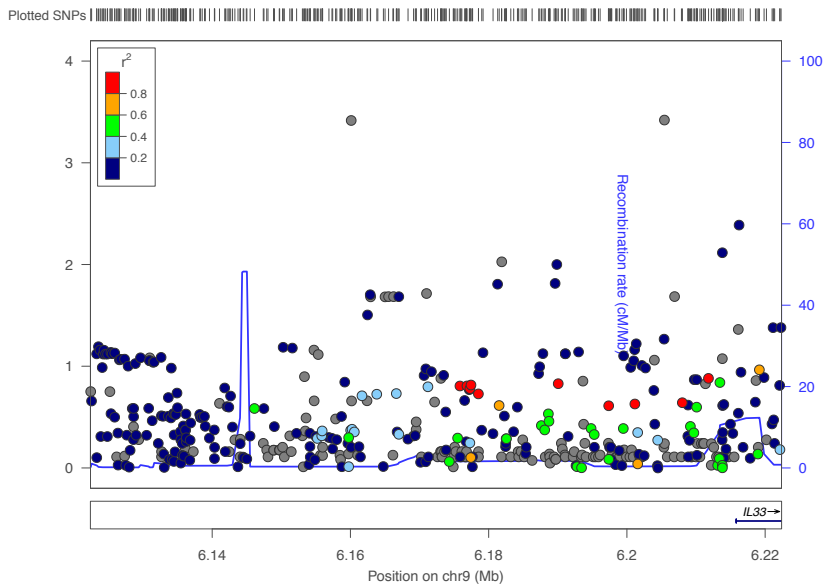

**Supplementary Figure 9. Association of variants in loci previously reported to be associated to be associated with allergic sensitization with EoE risk.** The variant that was most highly associated in the allergic sensitization study is indicated by a purple diamond and given in each panel. The LD values ( $r^2$ ) between the lead SNP and the other SNPs as assessed in the March 2012 release of the 1,000 genomes project are indicated in different colors. The blue lines behind the genetic variants indicate the recombination rates in cM per Mb using HapMap controls.

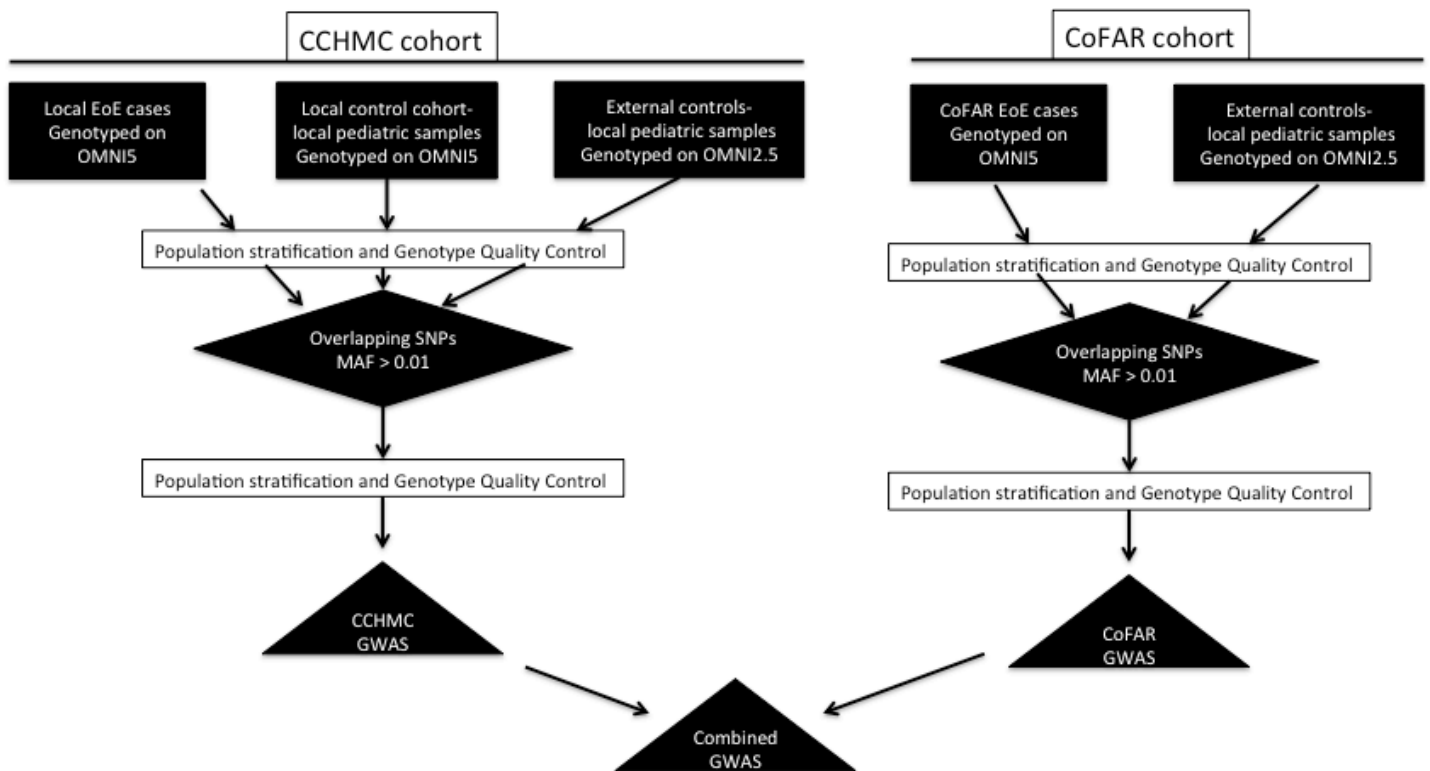

**Supplementary Figure 10. Flow chart of the EoE GWAS analytical pipeline.** External controls from University of Michigan (acquired through dbGAP) were randomly assigned to CCHMC and CoFAR cohort. CoFAR, NIH Consortium of Food Allergy Research [CoFAR]; EoE, Eosinophilic Esophagitis; GWAS, genome-wide association study; MAF, minor allele frequency; SNP, single nucleotide polymorphism.

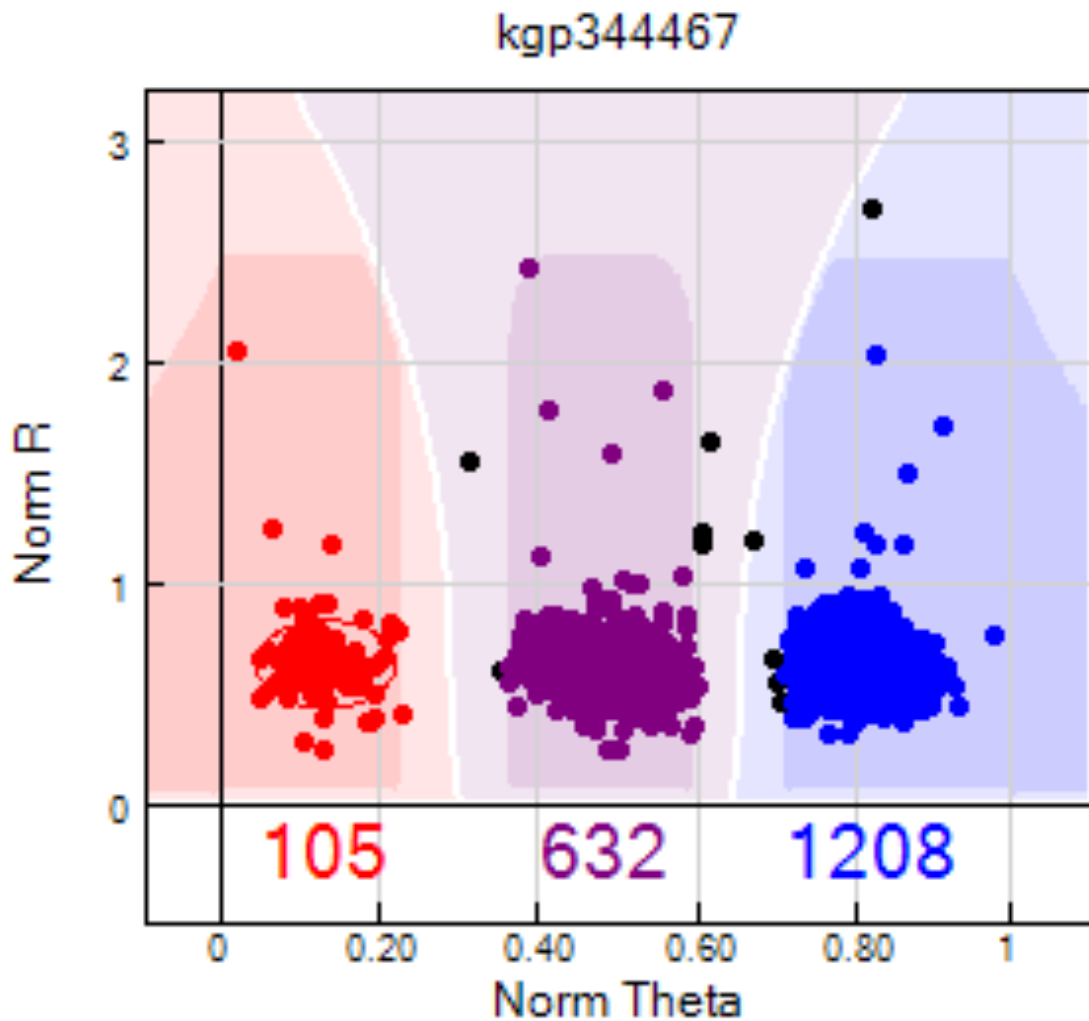

**Supplementary Figure 11. The Genome-Studio cluster plot for rs8041227 (aka kgp344467) at 15q13 on chromosome 15 from the OMNI5 analysis (all EoE cases and local controls).** The normalized theta (Norm Theta) is the ratio of signal intensities assayed for the A and B of the rs8041227 allele against normalized R (signal intensity; Norm R). Subjects in this graph are homozygous risk (red), heterozygotes (purple), or homozygous non-risk (blue).
